# Supplementary material
Source: bioRxiv or medRxiv preprint supplement (https://www.biorxiv.org/highwire/filestream/27190/field_highwire_adjunct_files/14/094060-6.pdf)

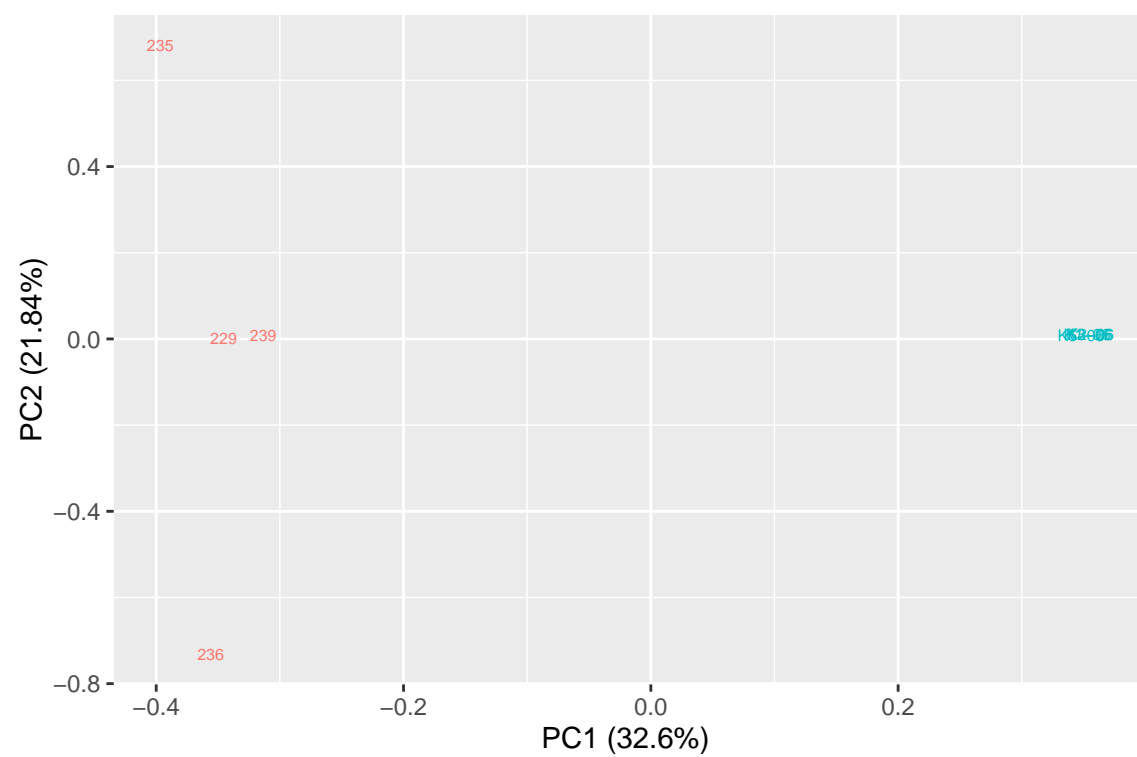

Supplement: Supplementary file [file 094060-6.pdf]
